CORRECTION

# Correction: Comparison of Clinical Manifestations and Outcomes between Hepatitis B Virus- and Hepatitis C Virus-Related Hepatocellular Carcinoma: Analysis of a Nationwide Cohort

The *PLOS ONE* Staff

There are errors in the author affiliations. The affiliations should appear as shown here: Dong Hyun Sinn<sup>1,2</sup>, Geum-Youn Gwak<sup>1,2</sup>, Juhee Cho<sup>3,4</sup>, Seung Woon Paik<sup>1,2</sup>, Byung Chul Yoo<sup>1,2</sup>

1 The Korean Liver Cancer Study Group, 2 Department of Medicine, Samsung Medical Center, Sungkyunkwan University School of Medicine, Seoul, Korea, 3 Department of Health Science and Technology, Samsung Advanced Institute for Health Science and Technology, Sungkyunkwan University, Seoul, Korea, 4 Department of Health, Behavior and Society and Epidemiology, Johns Hopkins Bloomberg School of Public Health, Baltimore, United States of America.

## Reference

1. Sinn DH, Gwak G-Y, Cho J, Paik SW, Yoo BC (2014) Comparison of Clinical Manifestations and Outcomes between Hepatitis B Virus- and Hepatitis C Virus-Related Hepatocellular Carcinoma: Analysis of a Nationwide Cohort. *PLoS ONE* 9(11): e112184. doi: [10.1371/journal.pone.0112184](https://doi.org/10.1371/journal.pone.0112184)

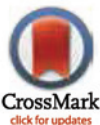

## OPEN ACCESS

**Citation:** The *PLOS ONE* Staff (2015) Correction: Comparison of Clinical Manifestations and Outcomes between Hepatitis B Virus- and Hepatitis C Virus-Related Hepatocellular Carcinoma: Analysis of a Nationwide Cohort. *PLoS ONE* 10(1): e0116652. doi:10.1371/journal.pone.0116652

**Published:** January 23, 2015

**Copyright:** © 2015 The PLOS ONE Staff. This is an open access article distributed under the terms of the [Creative Commons Attribution License](https://creativecommons.org/licenses/by/4.0/), which permits unrestricted use, distribution, and reproduction in any medium, provided the original author and source are credited.
